# Supplementary material for: Plant-Based Diet, Cholesterol, and Risk of Gallstone Disease: A Prospective Study
Source: MDPI journal article supplement (doi:10.3390/nu11020335), 2019-02-04
Supplement: s1 [file s1]

## Supplemental Materials

**Table S1.** Sensitivity test by eliminating symptomatic GSD cases diagnosed within one year of enrollment.

|            |                      | All               | Male              | Female            |
|------------|----------------------|-------------------|-------------------|-------------------|
| Vegetarian | Cases / Person-years | 75 / 29284        | 33 / 11960        | 42 / 17324        |
|            | HR (95% CI)          | 0.62 (0.34, 1.13) | 1.26 (0.51, 3.14) | 0.42 (0.19, 0.93) |

Adjusted for age, sex, education, smoking status, alcohol, sport, diabetes, chronic kidney disease, BMI, lipid-lowering medications, menopause (for female)

Abbreviation: HR, hazard ration; CI, confidence interval.
